# Supplementary material for: Crystal engineering and sorption studies on CN- and dipyridyl-bridged 2D coordination polymers
Source: Royal Society of Chemistry journal article supplement (doi:10.1039/d4ce00459k), 2024-01-01
Supplement: d4ce00459k1.pdf [file d4ce00459k1.pdf]

## Supporting Information

### Crystal engineering and sorption studies on CN- and dipyridyl-bridged 2D coordination polymers

Valoise Brenda Nguepmeni Eloundou<sup>a,b</sup>, Patrice Kenfack Tsobnang<sup>\*a</sup>, Theophile Kamgaing<sup>a</sup>, Chiranjib Gogoi<sup>b</sup>, Nieves Lopez-Salas<sup>c</sup>, Susan A. Bourne<sup>\*b</sup>

<sup>a</sup> Department of Chemistry, University of Dschang, PO Box 67, Dschang, Cameroon

<sup>b</sup> Centre for Supramolecular Chemistry Research, University of Cape Town, Rondebosch 7701, South Africa

<sup>c</sup> Sustainable Materials Chemistry, Department of Chemistry, Paderborn University, Warburger Str. 100, 33098, Paderborn, Germany

#### Corresponding Authors:

Prof. Susan Bourne: [susan.bourne@uct.ac.za](mailto:susan.bourne@uct.ac.za)

A/Prof. Patrice Kenfack Tsobnang: [pakenfack@gmail.com](mailto:pakenfack@gmail.com), [patrice.kenfack@univ-dschang.org](mailto:patrice.kenfack@univ-dschang.org)

**Additional Emails:** [eloundoubrenda@gmail.com](mailto:eloundoubrenda@gmail.com), [theokamgaing@yahoo.fr](mailto:theokamgaing@yahoo.fr), [nieves.lopez.salas@uni-paderborn.de](mailto:nieves.lopez.salas@uni-paderborn.de), [chiranjib.gogoi@uct.ac.za](mailto:chiranjib.gogoi@uct.ac.za).

#### Section 1: Synthesis of $K_2[Ni(CN)_4] \cdot H_2O$

$K_2[Ni(CN)_4] \cdot H_2O$  was prepared as reported in previous works [1-3], by mixing stoichiometric amounts of nickel(II) chloride hexahydrate with potassium cyanide in water solution. To 10 mL aqueous solution of  $NiCl_2 \cdot 6H_2O$  (0.238 g, 1 mmol) was added a 10 mL aqueous solution of KCN (0.13 g, 2 mmol). The grayish green precipitate of nickel cyanide  $[Ni(CN)_2]$  was washed carefully with hot water (100°C) to remove the impurities.  $[Ni(CN)_2]$  was then dissolved in 10 ml aqueous solution of KCN (0.13 g, 2 mmol). The orange obtained solution was filtered and kept at room temperature for crystallization, and yellow  $K_2[Ni(CN)_4] \cdot H_2O$  crystals were obtained after few days.

## Section 2: Characterisation of **1** and **2**

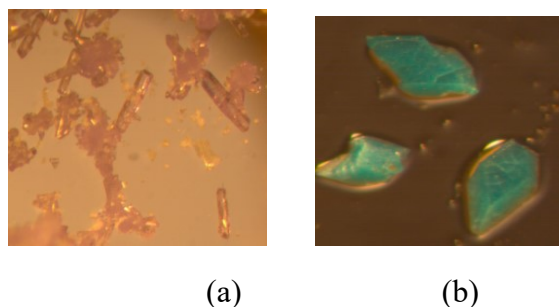

**Figure S1.** Microscopic picture of **1** (a) and microscopic picture of **2** (b).

### Infrared spectroscopy

The symmetric  $C^{sp^2}-H$  ( $-CH_2$ ) stretching vibrations appear at  $2940\text{ cm}^{-1}$  in **1** or at  $2938\text{ cm}^{-1}$  in **2**. We also note the presence of the adsorption band at  $2165\text{ cm}^{-1}$  (for **1**) or at  $2135\text{ cm}^{-1}$  (for **2**) which can be related to the vibration mode of  $C\equiv N$  which in the literature appears between  $2000-2200\text{ cm}^{-1}$  [4-5] We also note the presence of the adsorption band at  $1614\text{ cm}^{-1}$  (for **1**) or at  $1616\text{ cm}^{-1}$  (for **2**) characteristic of the vibration mode of the  $C=N$  [6] This band could be also assigned to the deformation vibration mode of OH which in the literature appears at  $1614\text{ cm}^{-1}$ . The adsorption band at  $1560\text{ cm}^{-1}$  which appears in both spectra is characteristic of the vibration mode of  $C=C$  group of 1,2-bis(4-pyridyl)ethane ligand. The presence of the adsorption band at  $1424\text{ cm}^{-1}$  can be assigned to the bending vibrational mode of the C-H bond of this ligand. The band at  $1358\text{ cm}^{-1}$  can be attributed to stretching vibrations of  $\nu(C-C, C-N)$  [6] The presence of the adsorption band at  $1020\text{ cm}^{-1}$  can be assigned to the  $CH_2$  wagging vibration mode of 1,2-bis(4-pyridyl)ethane [7]]. The band at  $834\text{ cm}^{-1}$  is assigned to aromatic ring vibration. The presence of the adsorption band at  $550$  or at  $547\text{ cm}^{-1}$  can be assigned to the vibrational mode of the Ni-N bond. It appears from this infrared spectroscopic analysis that the 1,2-bis(4-pyridyl)ethane, cyanide and water molecules are present in **1** and **2**.

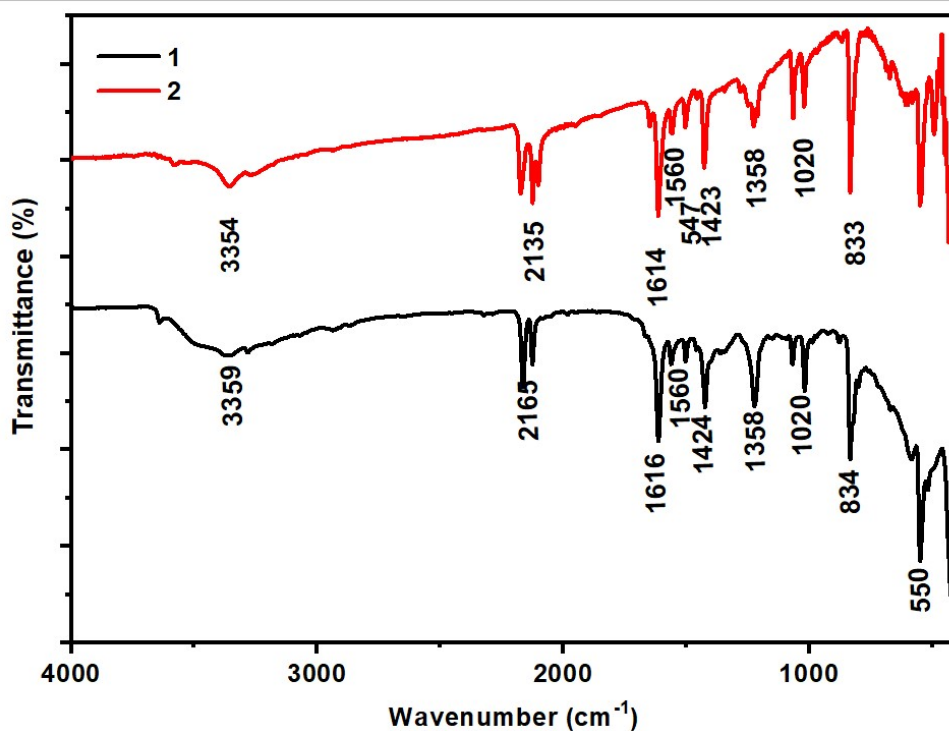

**Figure S2.** FTIR spectrum of **1** (black) and **2** (red).

**Table S1.** Summary of the assignment of the characteristic frequencies observed in the FTIR spectra of **1** and **2**.

| Frequencies bands (cm <sup>-1</sup> ) of 1 | Frequencies bands (cm <sup>-1</sup> ) of 2 | Assigned vibrations     |
|--------------------------------------------|--------------------------------------------|-------------------------|
| 3359                                       | 3354                                       | Y-O-H                   |
| 2940                                       | 2938                                       | YCH <sub>2</sub>        |
| 2165                                       | 2135                                       | YC≡N                    |
| 1614                                       | 1616                                       | YC=N or δO-H            |
| 1560                                       | 1560                                       | YC=C                    |
| 1424                                       | 1423                                       | δC-H                    |
| 1358                                       | 1358                                       | Y(C-C,C-N)              |
| 1020                                       | 1060-1020                                  | CH <sub>2</sub> wagging |
| 834                                        | 833                                        | Aromatic ring           |
| 550                                        | 547                                        | YM-N                    |

Y : stretching ; δ : bending

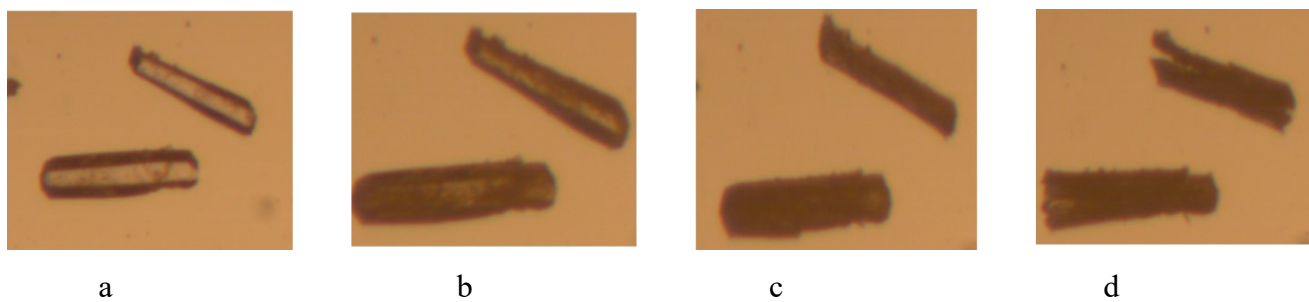

**Figure S3.** HSM images of **1** at (a) 21 °C, (b) 73 °C, (c) 80 °C, (d) 100-300 °C.

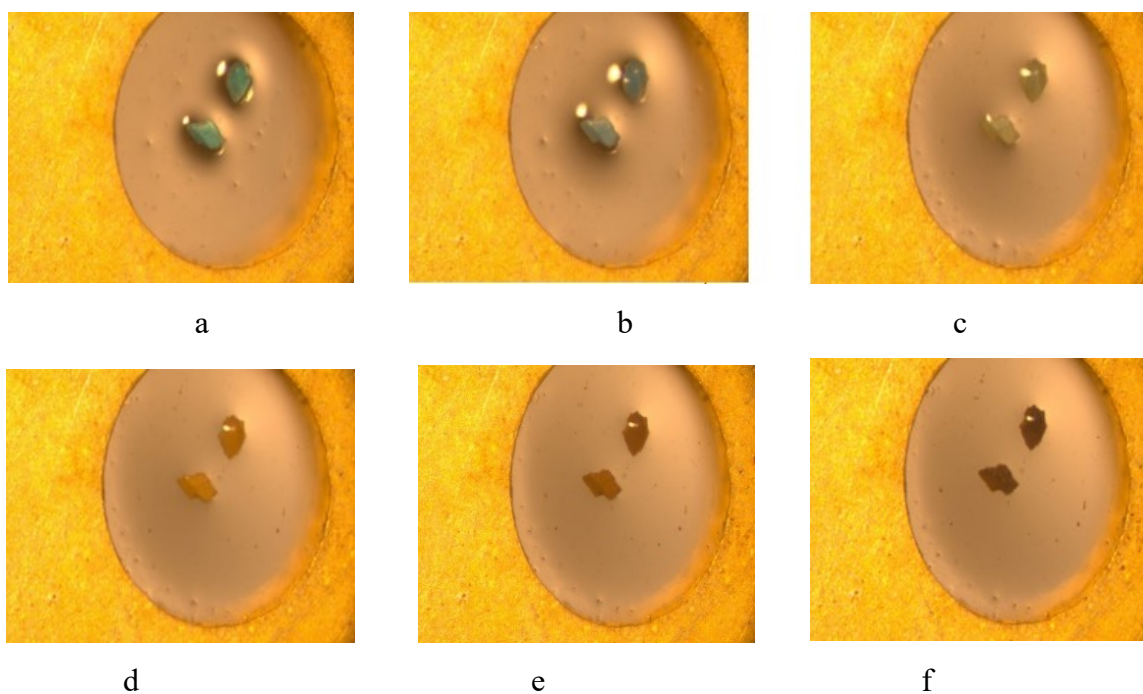

**Figure S4.** HSM images of **2** at (a) 26 °C, (b) 100 °C, (c) 245 °C, (d) 300°C, (e) 320 °C and (f) 330 °C.

## UV-Visible absorption analysis

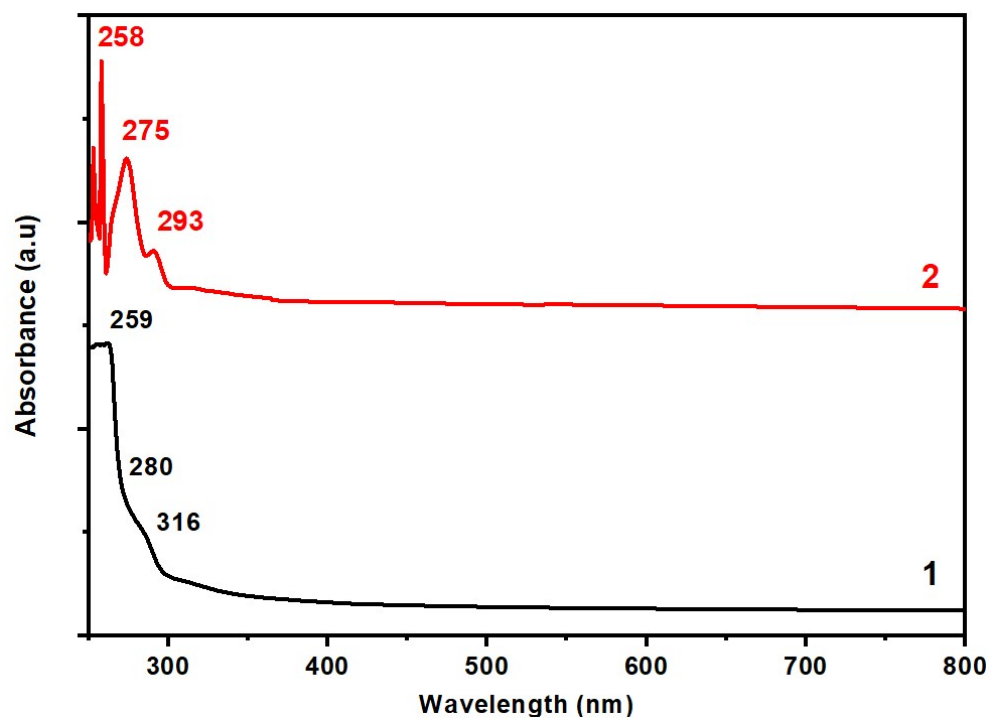

**Figure S5.** UV-Vis spectrum of **1** and **2**

The UV-Visible absorption spectrum of **1** and **2** (Figure S5) contains three absorption bands (259 nm, 280 nm and 316 nm for **1** and 258 nm, 275 nm and 293 nm for **2**). The two first one at 259 nm and 280 nm for **1** (or 258 nm and 275 nm for **2**) observed in the ultraviolet region of the spectrum could be attributed to  $n \rightarrow \pi^*$  electronic transition of 1,2-bis(4-pyridyl)ethane ligand. The third band at 316 nm for **1** (or 293 nm for **2**) denotes the presence of Ni atom in a square planar geometry and to the ligand field transitions, namely  ${}^1A_1 \rightarrow {}^1T_1$  in  $[\text{Ni}^{\text{II}}(\text{CN})_4]^{2-}$  [8].

**Table S2.** Bond distances (Å) for **1**

| Atom              | Atom                           | Length/Å  | Atom              | Atom                           | Length/Å  |
|-------------------|--------------------------------|-----------|-------------------|--------------------------------|-----------|
| Ni <sub>(1)</sub> | N <sub>(3)</sub>               | 2.125(2)  | Ni <sub>(2)</sub> | C <sub>(1C)</sub> <sup>2</sup> | 1.907(10) |
| Ni <sub>(1)</sub> | N <sub>(3)</sub> <sup>1</sup>  | 2.124(2)  | N <sub>(3)</sub>  | C <sub>(6)</sub>               | 1.344(4)  |
| Ni <sub>(1)</sub> | O <sub>(1)</sub>               | 2.103(2)  | N <sub>(3)</sub>  | C <sub>(3)</sub>               | 1.342(4)  |
| Ni <sub>(1)</sub> | O <sub>(1)</sub> <sup>1</sup>  | 2.103(2)  | N <sub>(2)</sub>  | C <sub>(2)</sub>               | 1.151(4)  |
| Ni <sub>(1)</sub> | N <sub>(2)</sub>               | 2.051(2)  | C <sub>(6)</sub>  | C <sub>(7)</sub>               | 1.383(4)  |
| Ni <sub>(1)</sub> | N <sub>(2)</sub> <sup>1</sup>  | 2.051(2)  | C <sub>(3)</sub>  | C <sub>(4)</sub>               | 1.377(4)  |
| Ni <sub>(2)</sub> | C <sub>(2)</sub>               | 1.852(3)  | C <sub>(5)</sub>  | C <sub>(7)</sub>               | 1.385(4)  |
| Ni <sub>(2)</sub> | C <sub>(2)</sub> <sup>2</sup>  | 1.852(3)  | C <sub>(5)</sub>  | C <sub>(4)</sub>               | 1.384(4)  |
| Ni <sub>(2)</sub> | C <sub>(1B)</sub> <sup>2</sup> | 1.807(16) | C <sub>(5)</sub>  | C <sub>(8)</sub>               | 1.506(4)  |
| Ni <sub>(2)</sub> | C <sub>(1B)</sub>              | 1.807(16) | C <sub>(8)</sub>  | C <sub>(8)</sub> <sup>3</sup>  | 1.549(6)  |
| Ni <sub>(2)</sub> | C <sub>(1A)</sub> <sup>2</sup> | 1.900(12) | C <sub>(1B)</sub> | N <sub>(1B)</sub>              | 1.186(19) |
| Ni <sub>(2)</sub> | C <sub>(1A)</sub>              | 1.900(12) | N <sub>(1A)</sub> | C <sub>(1A)</sub>              | 1.130(14) |
| Ni <sub>(2)</sub> | C <sub>(1C)</sub>              | 1.907(10) | N <sub>(1C)</sub> | C <sub>(1C)</sub>              | 1.127(12) |
| O <sub>(1)</sub>  | H <sub>(1A)</sub>              | 0.980(17) | O <sub>(1)</sub>  | H <sub>(1B)</sub>              | 0.997(17) |
| C <sub>(3)</sub>  | H <sub>(3)</sub>               | 0.9500    | C <sub>(6)</sub>  | H <sub>(6)</sub>               | 0.9500    |
| C <sub>(4)</sub>  | H <sub>(4)</sub>               | 0.9500    | C <sub>(8)</sub>  | H <sub>(8A)</sub>              | 0.9900    |
| C <sub>(8)</sub>  | H <sub>(8B)</sub>              | 0.9900    |                   |                                |           |

<sup>1</sup>1-X,1-Y,-Z; <sup>2</sup>2-X,2-Y,-Z; <sup>3</sup>2-X,1-Y,1-Z**Table S3.** Bond angles (°) for **1**

| Atom                          | Atom              | Atom                          | Angle/°  | Atom                           | Atom              | Atom                           | Angle/°  |
|-------------------------------|-------------------|-------------------------------|----------|--------------------------------|-------------------|--------------------------------|----------|
| N <sub>(3)</sub> <sup>1</sup> | Ni <sub>(1)</sub> | N <sub>(3)</sub>              | 180.0    | C <sub>(1B)</sub>              | Ni <sub>(2)</sub> | C <sub>(2)</sub>               | 90.4(5)  |
| O <sub>(1)</sub>              | Ni <sub>(1)</sub> | N <sub>(3)</sub>              | 90.82(9) | C <sub>(1B)</sub> <sup>2</sup> | Ni <sub>(2)</sub> | C <sub>(2)</sub>               | 89.6(5)  |
| O <sub>(1)</sub> <sup>1</sup> | Ni <sub>(1)</sub> | N <sub>(3)</sub> <sup>1</sup> | 90.84(9) | C <sub>(1B)</sub> <sup>2</sup> | Ni <sub>(2)</sub> | C <sub>(1C)</sub> <sup>2</sup> | 10.8(7)  |
| O <sub>(1)</sub>              | Ni <sub>(1)</sub> | N <sub>(3)</sub> <sup>1</sup> | 89.16(9) | C <sub>(1B)</sub>              | Ni <sub>(2)</sub> | C <sub>(1C)</sub> <sup>2</sup> | 169.2(7) |
| O <sub>(1)</sub> <sup>1</sup> | Ni <sub>(1)</sub> | N <sub>(3)</sub>              | 89.18(9) | C <sub>(1A)</sub> <sup>2</sup> | Ni <sub>(2)</sub> | C <sub>(1A)</sub>              | 180.0    |
| O <sub>(1)</sub> <sup>1</sup> | Ni <sub>(1)</sub> | O <sub>(1)</sub>              | 180.0    | C <sub>(1A)</sub>              | Ni <sub>(2)</sub> | C <sub>(1C)</sub> <sup>2</sup> | 159.1(6) |
| N <sub>(2)</sub>              | Ni <sub>(1)</sub> | N <sub>(2)</sub> <sup>1</sup> | 180.0    | N <sub>(2)</sub>               | C <sub>(2)</sub>  | Ni <sub>(2)</sub>              | 179.1(2) |

|                                |                   |                                |            |                                |                   |                                |           |
|--------------------------------|-------------------|--------------------------------|------------|--------------------------------|-------------------|--------------------------------|-----------|
| C <sub>(2)</sub> <sup>2</sup>  | Ni <sub>(2)</sub> | C <sub>(2)</sub>               | 180.00(18) | N <sub>(1B)</sub>              | C <sub>(1B)</sub> | Ni <sub>(2)</sub>              | 178.1(16) |
| N <sub>(2)</sub> <sup>1</sup>  | Ni <sub>(1)</sub> | O <sub>(1)</sub>               | 91.24 (9)  | N <sub>(2)</sub>               | Ni <sub>(1)</sub> | O <sub>(1)</sub>               | 88.76 (9) |
| N <sub>(2)</sub> <sup>1</sup>  | Ni <sub>(1)</sub> | O <sub>(1)</sub> <sup>1</sup>  | 88.76 (9)  | N <sub>(2)</sub> <sup>1</sup>  | Ni <sub>(1)</sub> | O <sub>(1)</sub> <sup>1</sup>  | 91.24 (9) |
| N <sub>(2)</sub> <sup>1</sup>  | Ni <sub>(1)</sub> | N <sub>(3)</sub> <sup>1</sup>  | 89.70 (9)  | N <sub>(2)</sub>               | Ni <sub>(1)</sub> | N <sub>(3)</sub> <sup>1</sup>  | 90.30 (9) |
| N <sub>(2)</sub> <sup>1</sup>  | Ni <sub>(1)</sub> | N <sub>(3)</sub>               | 90.30 (9)  | N <sub>(2)</sub>               | Ni <sub>(1)</sub> | N <sub>(3)</sub>               | 89.70 (9) |
| O <sub>(1)</sub>               | Ni <sub>(1)</sub> | N <sub>(3)</sub>               | 89.16(9)   | N <sub>(3)</sub> <sup>1</sup>  | Ni <sub>(1)</sub> | N <sub>(3)</sub>               | 180.0     |
| C <sub>(1B)</sub> <sup>2</sup> | Ni <sub>(2)</sub> | C <sub>(1B)</sub>              | 180.0      | C <sub>(2)</sub>               | Ni <sub>(2)</sub> | C <sub>(1A)</sub>              | 93.4(4)   |
| C <sub>(2)</sub> <sup>2</sup>  | Ni <sub>(2)</sub> | C <sub>(1A)</sub> <sup>2</sup> | 93.4(4)    | C <sub>(2)</sub>               | Ni <sub>(2)</sub> | C <sub>(1A)</sub> <sup>2</sup> | 86.6(4)   |
| C <sub>(2)</sub> <sup>2</sup>  | Ni <sub>(2)</sub> | C <sub>(1A)</sub>              | 86.6(4)    | C <sub>(2)</sub> <sup>2</sup>  | Ni <sub>(2)</sub> | C <sub>(1C)</sub>              | 91.9(3)   |
| C <sub>(2)</sub>               | Ni <sub>(2)</sub> | C <sub>(1C)</sub>              | 88.1(3)    | C <sub>(2)</sub> <sup>2</sup>  | Ni <sub>(2)</sub> | C <sub>(1C)</sub> <sup>2</sup> | 88.1(3)   |
| C <sub>(2)</sub>               | Ni <sub>(2)</sub> | C <sub>(1C)</sub> <sup>2</sup> | 91.9(3)    | C <sub>(1A)</sub> <sup>2</sup> | Ni <sub>(2)</sub> | C <sub>(1C)</sub> <sup>2</sup> | 20.9(6)   |

<sup>1</sup>1-X,1-Y,-Z; <sup>2</sup>-X,2-Y,-Z

**Table S4.** Bond distances (Å) for **2**

| Atom | Atom            | Length/Å  | Atom | Atom            | Length/Å  |
|------|-----------------|-----------|------|-----------------|-----------|
| Cu1  | N3 <sup>1</sup> | 2.058(2)  | N2   | C2              | 1.153(3)  |
| Cu1  | N3              | 2.058(2)  | C4   | C7              | 1.385(3)  |
| Cu1  | O1              | 2.030(2)  | C4   | C3              | 1.388(3)  |
| Cu1  | O1 <sup>1</sup> | 2.030(2)  | C7   | C6              | 1.391(4)  |
| Cu1  | N2 <sup>1</sup> | 2.438(2)  | C7   | C8              | 1.510(3)  |
| Cu1  | N2              | 2.438(2)  | C6   | C5              | 1.384(3)  |
| Ni1  | C1 <sup>2</sup> | 1.870(3)  | N1   | C1              | 1.149(4)  |
| Ni1  | C1              | 1.870(3)  | C8   | C8 <sup>3</sup> | 1.537(5)  |
| Ni1  | C2 <sup>2</sup> | 1.870(3)  | C10  | C9              | 1.277(18) |
| Ni1  | C2              | 1.870(3)  | C10  | O2              | 1.580(19) |
| N3   | C5              | 1.344(3)  | C10  | O3              | 1.356(19) |
| N3   | C3              | 1.343(3)  | O3   | O3 <sup>5</sup> | 1.33(3)   |
| O1   | H1A             | 0.993(17) | O1   | H1B             | 0.90(2)   |
| C4   | H4              | 0.88(3)   | C6   | H6              | 0.9500    |

|     |                 |           |    |                 |           |
|-----|-----------------|-----------|----|-----------------|-----------|
| C5  | H5              | 0.97(3)   | C3 | H3              | 0.95(3)   |
| C8  | H8A             | 0.9900    | C8 | H8B             | 0.9900    |
| C10 | C9 <sup>4</sup> | 2.012(13) | C9 | C9 <sup>4</sup> | 1.889(17) |

<sup>1</sup>1-X,-Y,1-Z; <sup>2</sup>2-X,1-Y,1-Z; <sup>3</sup>3-X,1-Y,2+Z; <sup>4</sup>1-X,-Y,2-Z ; <sup>5</sup>2- X,-Y,2+Z

**Table S5.** Bond angles (°) for **2**

| Atom            | Atom | Atom            | Angle/°   | Atom            | Atom | Atom             | Angle/°    |
|-----------------|------|-----------------|-----------|-----------------|------|------------------|------------|
| N3 <sup>1</sup> | Cu1  | N3              | 180.0     | C2 <sup>2</sup> | Ni1  | C2               | 180.0      |
| N3              | Cu1  | N2 <sup>1</sup> | 90.10(8)  | C5              | N3   | Cu1              | 119.79(17) |
| N3 <sup>1</sup> | Cu1  | N2              | 89.90(8)  | C3              | N3   | Cu1              | 122.39(16) |
| N3 <sup>1</sup> | Cu1  | N2 <sup>1</sup> | 90.10(8)  | C3              | N3   | C5               | 117.7(2)   |
| N3              | Cu1  | N2              | 90.10(8)  | C2              | N2   | Cu1              | 157.6(2)   |
| O1              | Cu1  | N3 <sup>1</sup> | 90.17(9)  | C7              | C4   | C3               | 119.8(2)   |
| O1              | Cu1  | N3              | 89.83(9)  | C4              | C7   | C6               | 117.3(2)   |
| O1 <sup>1</sup> | Cu1  | N3              | 90.17(9)  | C4              | C7   | C8               | 122.4(2)   |
| O1 <sup>1</sup> | Cu1  | N3 <sup>1</sup> | 89.83(9)  | C6              | C7   | C8               | 120.2(2)   |
| O1              | Cu1  | O1 <sup>1</sup> | 180.0     | C5              | C6   | C7               | 119.8(2)   |
| O1              | Cu1  | N2 <sup>1</sup> | 88.16(9)  | N3              | C5   | C6               | 122.6(2)   |
| O1              | Cu1  | N2              | 91.84(9)  | N3              | C3   | C4               | 122.6(2)   |
| O1 <sup>1</sup> | Cu1  | N2              | 88.16(9)  | N1              | C1   | Ni1              | 177.9(2)   |
| O1 <sup>1</sup> | Cu1  | N2 <sup>1</sup> | 91.84(9)  | N2              | C2   | Ni1              | 178.4(2)   |
| N2              | Cu1  | N2 <sup>1</sup> | 180.00(8) | C7              | C8   | C8 <sup>3</sup>  | 110.6(2)   |
| C1 <sup>2</sup> | Ni1  | C1              | 180.0     | C9              | C10  | O2               | 133.4(9)   |
| C1              | Ni1  | C2              | 89.43(11) | C9              | C10  | O3               | 160.6(9)   |
| C1 <sup>2</sup> | Ni1  | C2              | 90.57(11) | C10             | C9   | C10 <sup>4</sup> | 114.3(8)   |
| C1 <sup>2</sup> | Ni1  | C2 <sup>2</sup> | 89.43(11) | C1              | Ni1  | C2 <sup>2</sup>  | 90.57(11)  |

<sup>1</sup>1-X,-Y,1-Z; <sup>2</sup>2-X,1-Y,1-Z; <sup>3</sup>3-X,1-Y,2+Z; <sup>4</sup>1-X,-Y,2-Z ; <sup>5</sup>2- X,-Y,2+Z



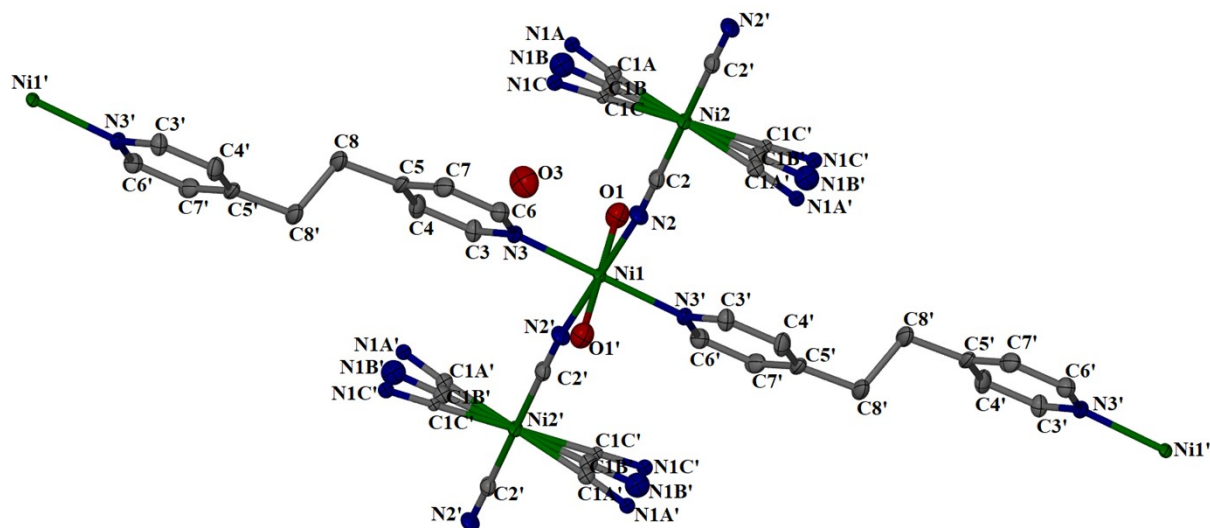

**Figure S6.** A basic motif of **1**, with total labeling scheme provided. All hydrogens were omitted for clarity.

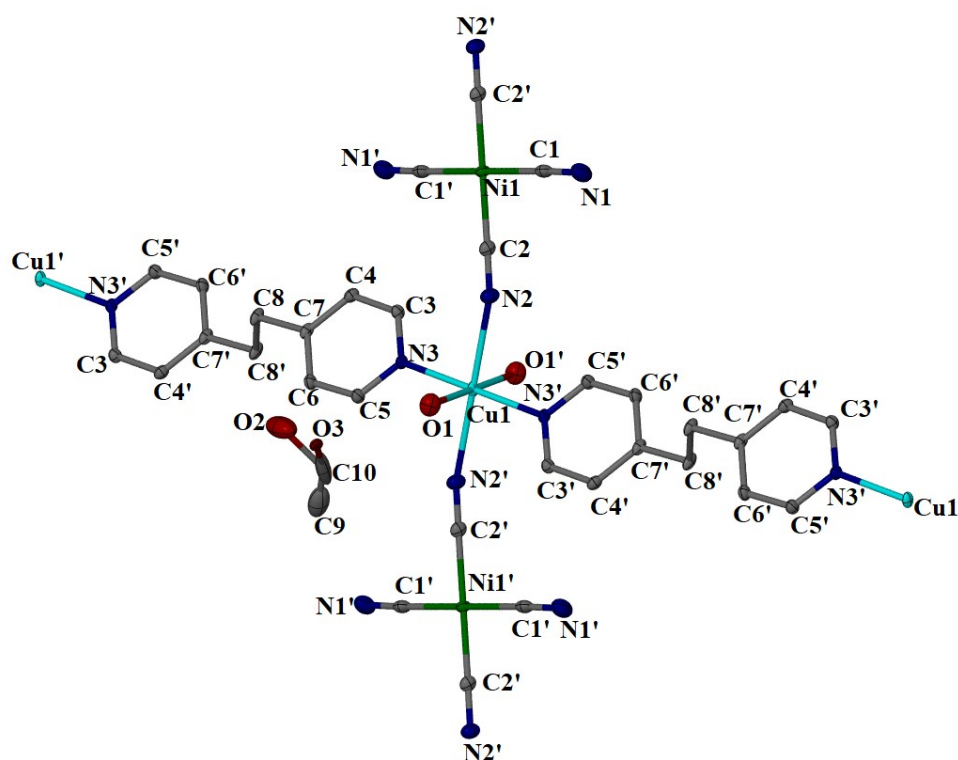

**Figure S7.** A basic motif of **2** molecules, with total labeling scheme provided. All hydrogens were omitted for clarity.

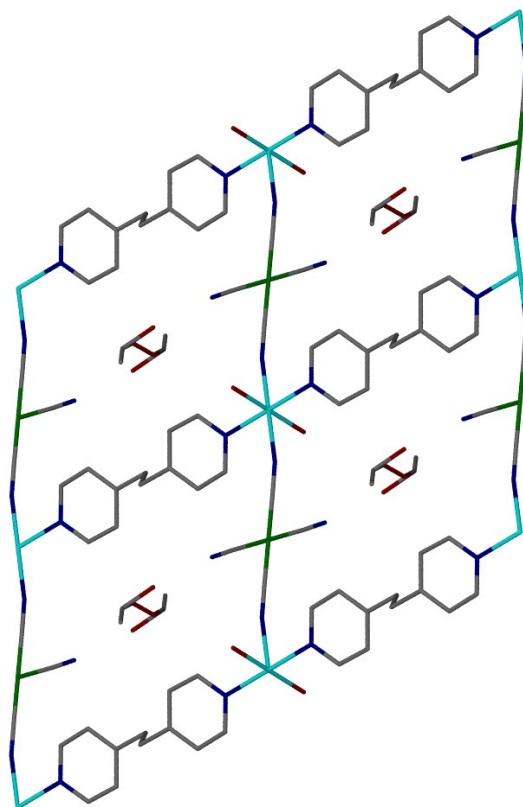

**Figure S8.** 2-periodic framework of **2** (green – Ni, cyan– Cu, blue – N, grey – C, red-O)

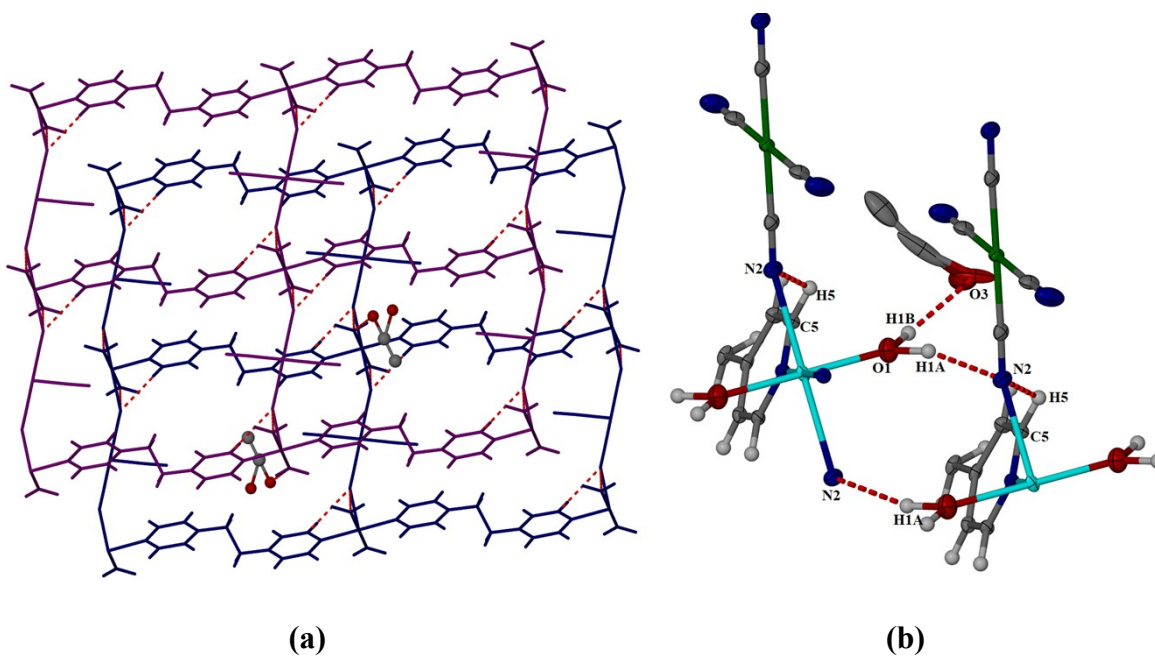

**Figure S9.** Bilayers and hydrogen bonds in **2** (**a** and **b**) formed by 2 separated neighboring 2-periodic frameworks through the hydrogen bonds. All hydrogens and crystallization waters were omitted for clarity.

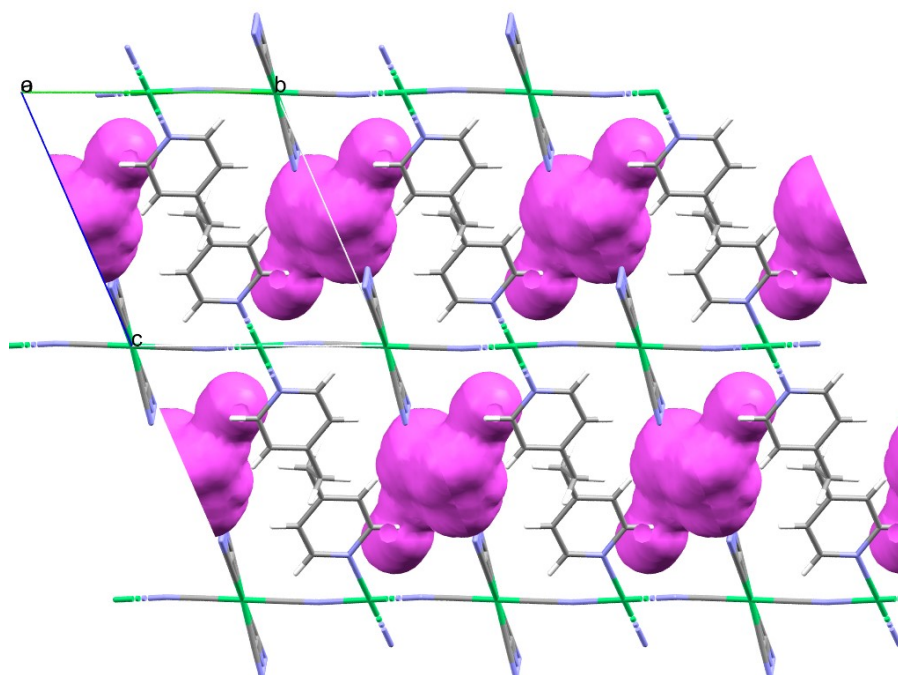

**Figure S10.** Potential void spaces without solvent molecules (coordinated and uncoordinated) in compound **1** as viewed along the a-axis directions.

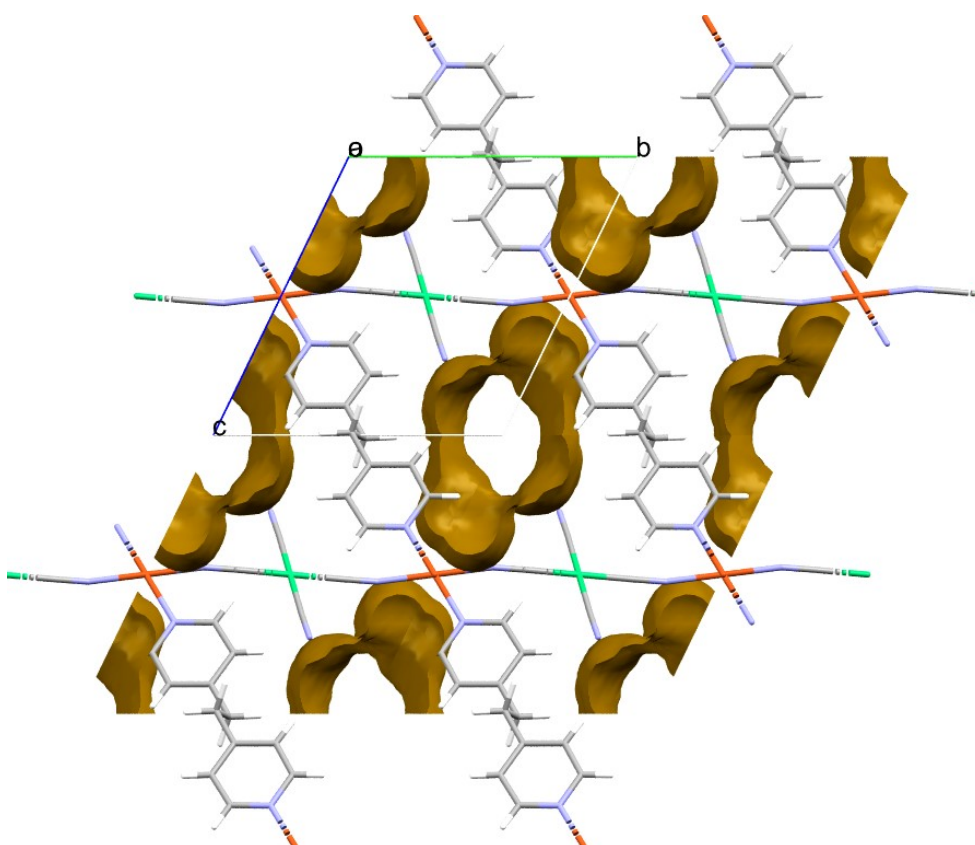

**Figure S11.** Potential void spaces without solvent molecules (coordinated and uncoordinated) in compound **2** as viewed along the a-axis directions.

## Variable-temperature powder X-ray diffraction of 1 and 2

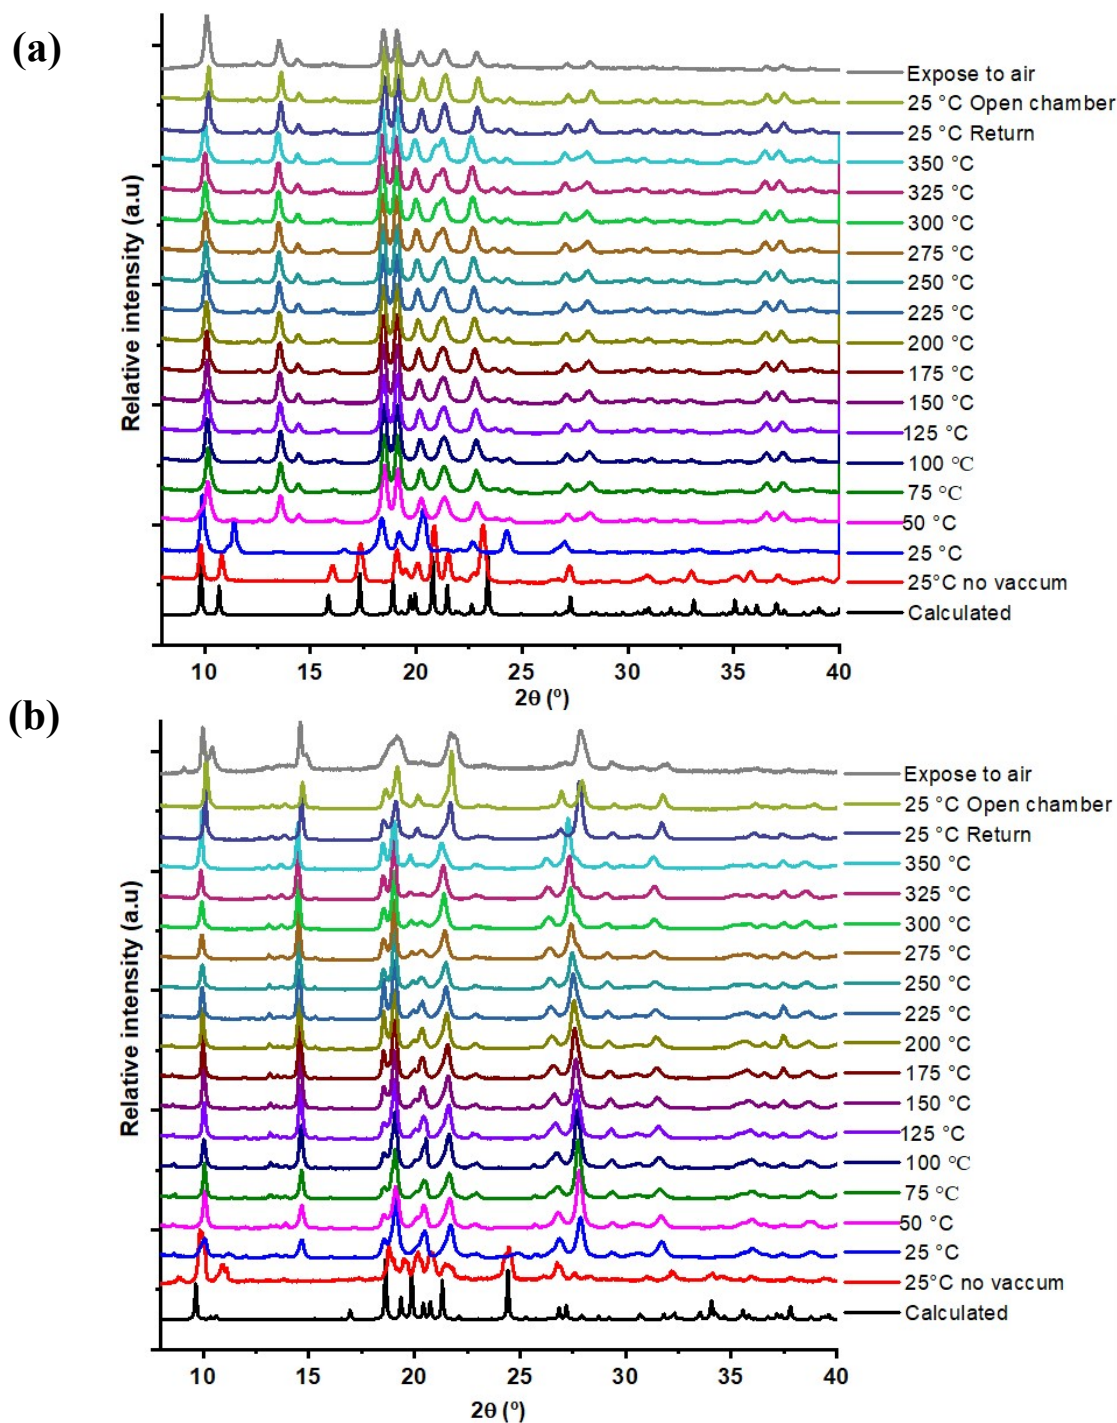

**Figure S12.** VT-PXRD patterns of **1** and **2** (a and b respectively) in the range 25–350 °C, returned to 25 °C under vacuum and subsequent exposure to air at room temperature.

The variable-temperature powder X-ray diffraction (VT-PXRD) patterns for **1** and **2** (see Figure 6) show that the material earlier transforms to an intermediate phase at 25 °C (under

vacuum), indicated mainly in the case of **1** (see Figure 6a) by the disappearance of the peak at 10.7, 15.9, 17.3, 20.7, 21.5 and all the peak after 30° and the appearance of the new peaks at 11.4, 18.5 and 24.3°. In the case of **2** (see Figure 6b), of the peak at 16.9° is disappeared while a new peaks at 14.7, 22.8 and 29.3° are appeared. The final phase in each material appears at 50 °C (under the vacuum), indicated mainly by the disappearance of the peaks at 11.4 and 24.3° 2θ and the appearance of the new peaks at 13.6, 14.5, 21.5, 28.4, 36.5 and 37.4° 2θ for **1** while for **2**, only the peak at 11.04° is disappeared indicating that the desolvation, both materials have different crystalline structure. The structure of **1** and **2** remain relatively crystalline up to 350 °C and remains the same after returning to 25°C. After 24h exposition to air, **1** and **2** remains unchanged.

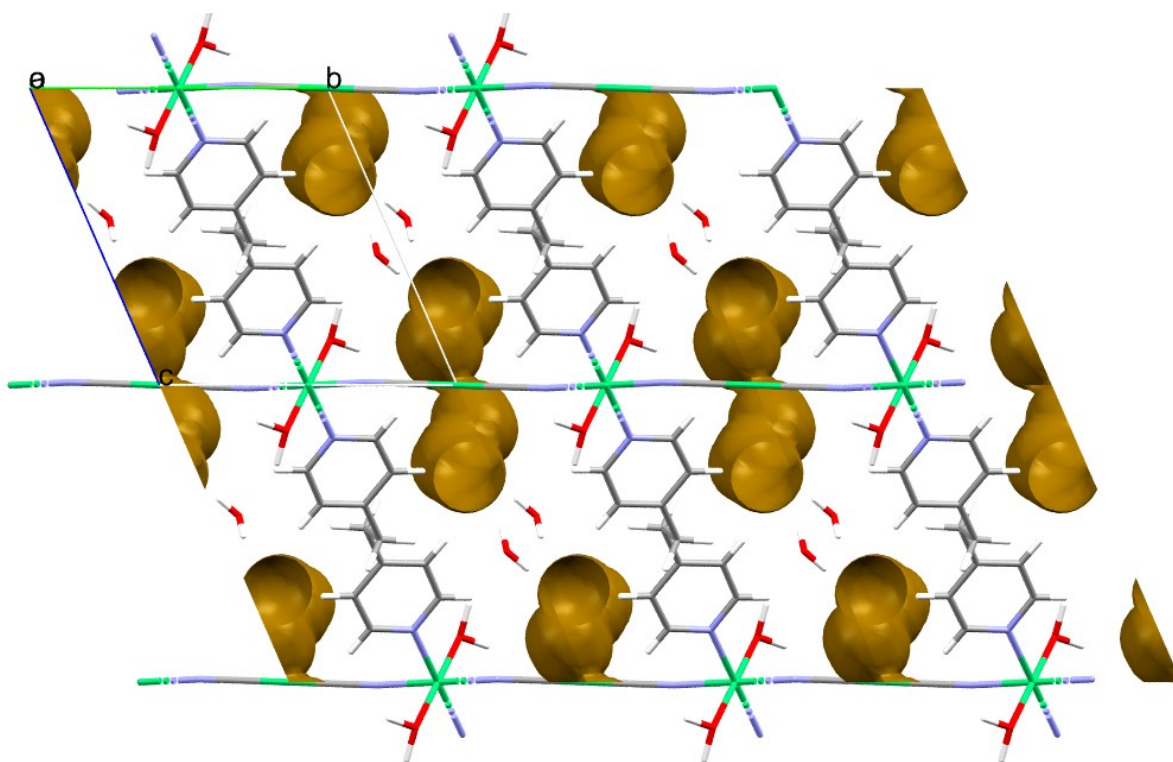

**Figure S13.** Potential void spaces without terminal cyanide group (the one with a disorder structure) in compound **1** as viewed along the a-axis directions.

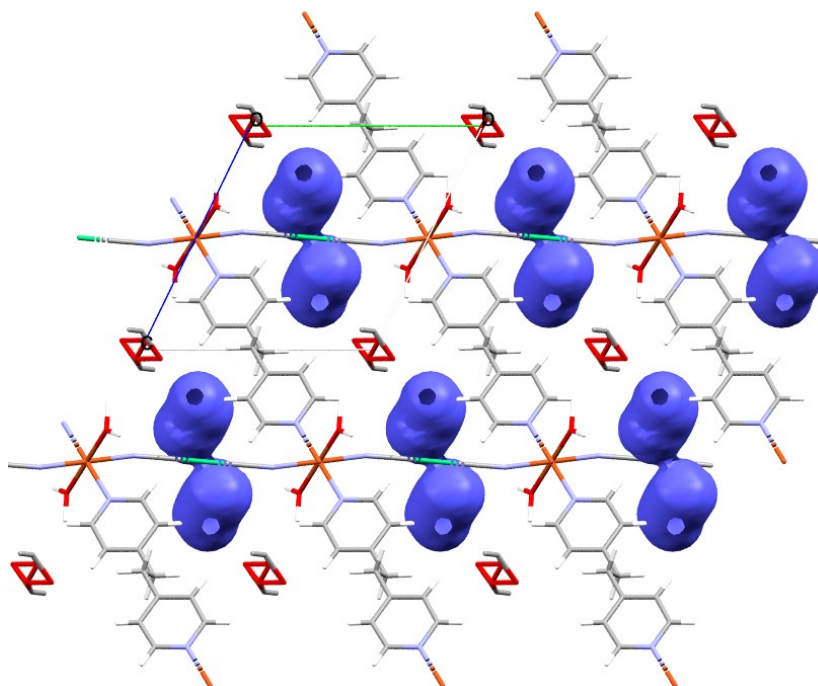

**Figure S14.** Potential void spaces without terminal cyanide group in compound **2a** as viewed along the a-axis directions.

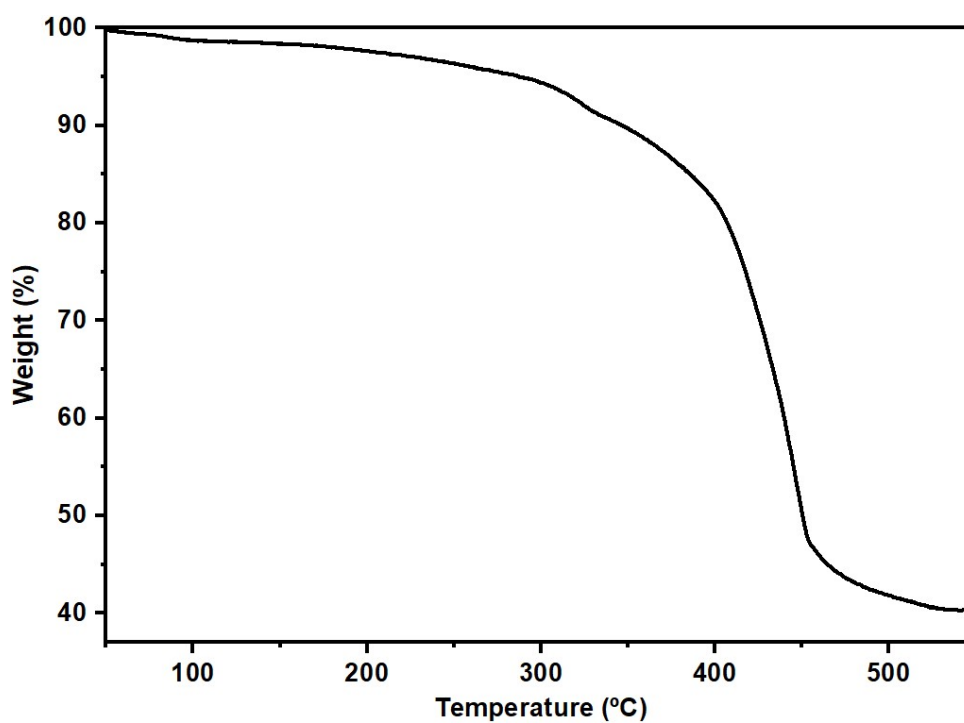

**Figure S15.** Thermogravimetric curve of compound **1** when dehydrated at 70°C.

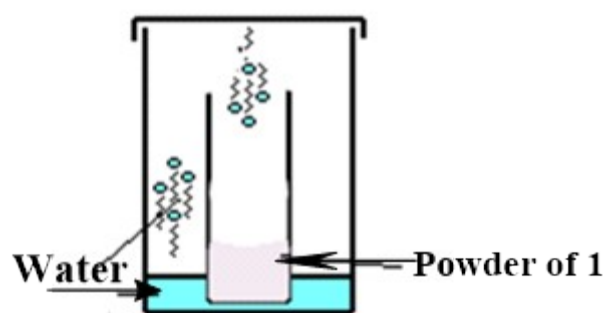

**Figure S16.** Diffusion system employed for the rehydration of powder of 1.

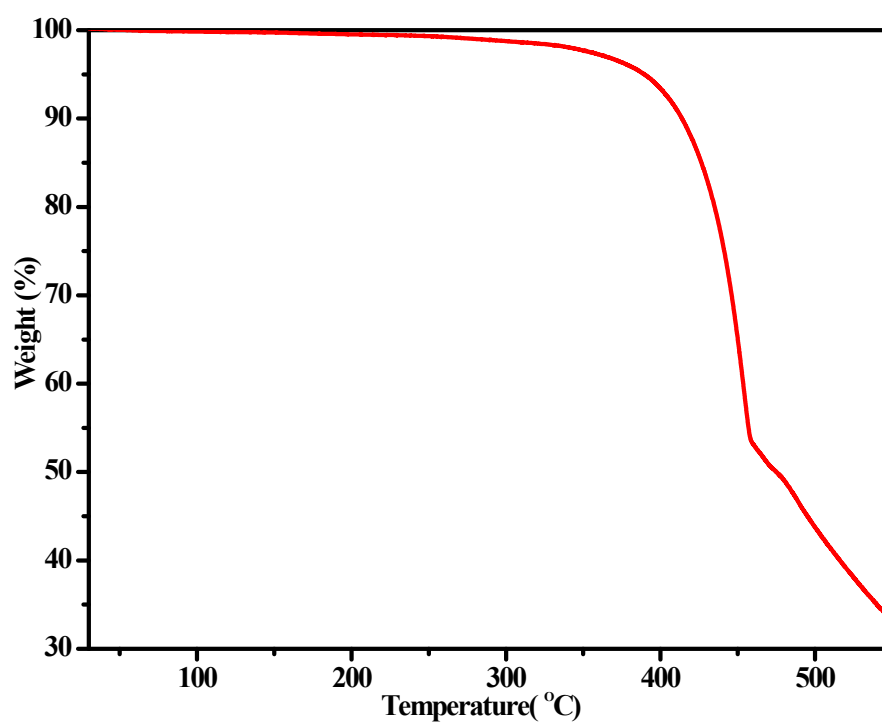

**Figure S17.** Thermogravimetric curve of compound 1 after exposure to air for 24 hours.

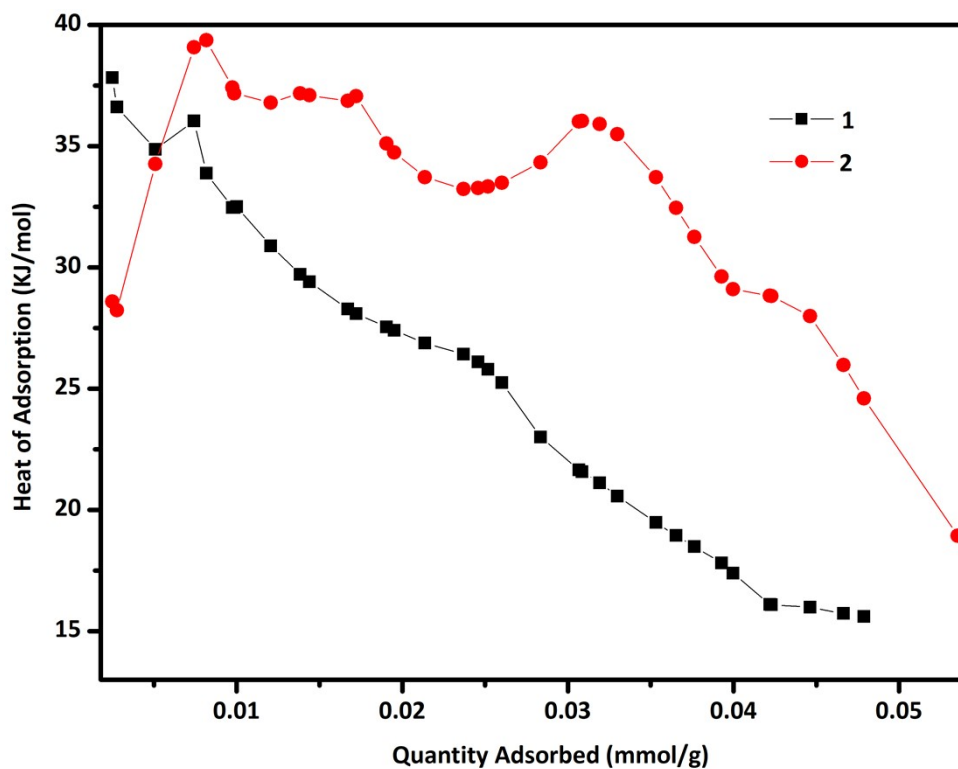

**Figure S18.** Heat of adsorption plot based on CO<sub>2</sub> isotherms from 273-298 K of **1** and **2**  
 Note that the maxima of load range values are determined by the maxima of 298 K isotherms for the MOF because 298 K CO<sub>2</sub> isotherms have the lowest sorption [9]

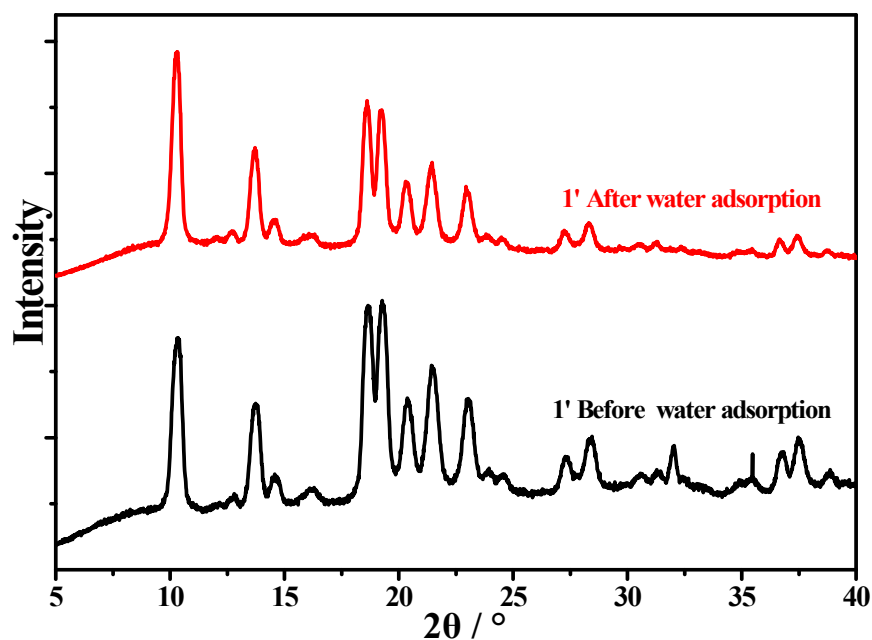

**Figure S19.** Powder X-ray diffraction patterns of **1** before and after water vapor adsorption analysis.



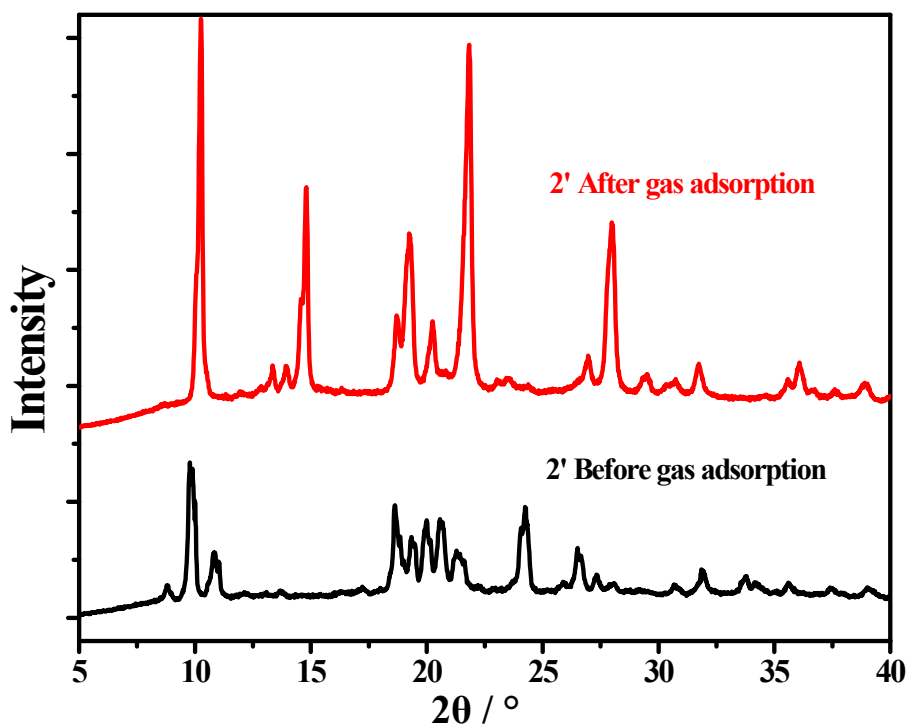

**Figure S20.** Powder X-ray diffraction patterns of **2** before and after water vapor adsorption analysis.

## References

1. N. Vannerberg, *Acta Chem. Scand.*, 1964, **18**, 2385.
2. E. Sayın, G. S. Kürkçüoğlu, O. Z. Yeşilel and M. Taş, *J. Coord. Chem.*, 2016, **69**, 1226-1235.
3. F. Çetinkaya, G. S. Kürkçüoğlu, O. Z. Yeşilel, T. Hökelek and H. Dal, *Polyhedron*, 2012, **47**, 126-133.
4. J. Černák and K. A. Abboud, *Acta Crystallogr. C Struct. Chem Acta Commun*, 2000, **56**, 783-785.
5. W. Wong-Ng, J. T. Culp, Y.-S. Chen, J. R. Deschamps and A. Marti, *Solid State Sci.*, 2016, **52**, 1-9.
6. N. de la Pinta, S. Martín, M. K. Urtiaga, M. G. Barandika, M. I. Arriortua, L. Lezama, G. Madariaga and R. Cortés, *Inorg. Chem.*, 2010, **49**, 10445-10454.
7. M. A. Susano, P. Martín-Ramos, T. M.R. Maria, S. Folkersma, L. C. J. Pereira, and M R. Silva, *J. Mol. Struct*, 2017, 1147, 76-83.

8. M. A. Halim, S. Karmakar, M. A. Hamid, C. S. S. Chandan, I. Rahaman, M. E. Urena, A. Haque, M. Y. Chen, C. P. Rhodes and G. W. Beall, *ACS Appl. Mater. Interfaces*, 2023, **15**, 53568-53583.
9. N. Chatterjee and C. L. Oliver, *Inorg. Chem.*, 2022, **61**, 3516-3526.
